# Supplementary material for: In situ growth of Zn-based metal–organic frameworks in ultra-high surface area nano-wood aerogel for efficient CO2 capture and separation
Source: Royal Society of Chemistry journal article supplement (doi:10.1039/d3ta02229c), 2023-01-01
Supplement: d3ta02229c1.pdf [file d3ta02229c1.pdf]

1 **In-situ growth of Zn-based Metal-Organic Frameworks in ultra-high surface area nano-wood**  
2 **aerogel for efficient CO<sub>2</sub> capture and separation**

3

4 Jianpeng Huang<sup>a</sup>, Deshi Yang<sup>a</sup>, Zhipeng Hu<sup>a</sup>, Huihui Zhang<sup>a</sup>, Zhijun Zhang<sup>a\*</sup>, Fengqiang Wang<sup>a</sup>, Ya  
5 njun Xie<sup>a</sup>, Shouxin Liu<sup>a</sup>, Qingwen Wang<sup>b</sup>, Charles U. Pittman Jr.<sup>c</sup>

6

7 <sup>a</sup>Key Laboratory of Biobased Material Science and Technology (Ministry of Education), Northeast  
8 Forestry University, Harbin 150040, PR China

9 <sup>b</sup>Collage of Materials and Energy, South China Agricultural University, Guangzhou 510642,  
10 PR China

11 <sup>c</sup>Department of Chemistry, Mississippi State University, Mississippi State, MS 39762, USA

12

13

14

15

16

17

18

19

20

21

22

23

24

25

26

27

28

29

30

31

32

33

34

35

36

37

38

1  
2 **SUPPORTING INFORMATION**

3 **Table of Contents**

4 **1. Materials..... 3**

5 **2. Experimental Section.....3**

6 **3. Characterization Section.....5**

7 **4. Figures.....9**

8 **5. Tables.....28**

9 **6. Reference.....30**

10  
11  
12  
13  
14  
15  
16  
17  
18  
19  
20  
21  
22  
23  
24  
25  
26  
27  
28  
29  
30  
31  
32  
33  
34  
35

## 1 **1. Materials**

2 Natural Balsa wood used in this study was purchased from SINOKINO materials company (China).  
3 The samples were cut into  $10 \times 10 \times 10$  (mm) cubes. Zinc nitrate hexahydrate  $\text{Zn}(\text{NO}_3)_2 \cdot 6\text{H}_2\text{O}$  (98 %),  
4 2,5-dihydroxyterephthalic acid (dhtp, > 98%), 2-methylimidazole (2-MeIm, > 99%), 2-  
5 aminobenzimidazole (BMI-NH<sub>2</sub>, > 97%), benzimidazole (BMI, > 98%), N, N- dimethyl- formamide  
6 (DMF,  $\geq 99.8$  %), dimethylacetamide (DMAc,  $\geq 99.8$  %), acetone (AR), methanol ( $\geq 99$  %),  
7 ethanol ( $\geq 99$  %), sodium chlorite ( $\text{NaClO}_2$ , 80%), sodium hypochlorite ( $\text{NaClO}$ , 10%), 2,2,6,6-  
8 tetramethylpiperidin-1-yloxy (TEMPO) and lithium chloride ( $\text{LiCl}$ ,  $\geq 99\%$ ) were purchased from  
9 Aladdin Shanghai China.  $\text{LiCl}$  was dried at 120 °C in vacuum overnight before use. Other reagents  
10 were used without further purification.

## 11 **2. Experimental Section**

### 12 **2.1 Preparation of Delignified Wood (DW)**

13 The synthesis of DW used here was reported elsewhere.<sup>1</sup> In a typical procedure, wood blocks were  
14 cooked in 2 wt% aqueous sodium chlorite with acetate buffer solution (pH 4.6) at 95 °C for 12 h.  
15 Each wood block dimension was  $10 \times 10 \times 10$  mm. Subsequently, the blocks were washed with  
16 deionized water several times to remove excess chemicals.

### 17 **2.2 Preparation of TEMPO-oxidized regenerated wood (TRW) templates**

18 The wet DW blocks obtained in the previous step were immersed in ethanol for water exchange 30  
19 min thrice, followed by immersion in DMAc for 30\_min thrice and then overnight. Then the wood  
20 blocks were immersed in 8 wt%  $\text{LiCl}$  / DMAc solution at 30 °C for 8 h to dissolve the wood cell  
21 wall partially. Then, the blocks were quickly immersed into acetone for at least 8 h to regenerate the  
22 nanocellulose aerogel within the regenerated wood (RW), and the RW blocks were repeatedly  
23 washed with deionized water. Next, the RW blocks were oxidized with a TEMPO/ $\text{NaClO}$ / $\text{NaClO}_2$  at  
24 60 °C and pH 6.8 for 48 h. After TEMPO-mediated oxidation, wood blocks were washed repeatedly  
25 using a 50% aqueous ethanol solution to remove residual chemicals. The washed samples were  
26 designated TRW.

### 27 **2.3 Fabrication of TRW/Z-74**

28  $\text{Zn}(\text{NO}_3)_2 \cdot 6\text{H}_2\text{O}$  (5 mmol) was dissolved in 50 ml of deionized water to obtain solution A. Then, 2.23

1 mmol of 2, 5-dihydroxyterephthalic acid was dissolved in 50 ml of 0.4M aqueous NaOH (solution B).  
2 Wet TRW samples (1 g dry mass) were next immersed in solution A for ion exchange procedures at  
3 room temperature for 6 h. To promote more  $Zn^{2+}$  to bind with cellulosic carboxyl groups, the TRW  
4 blocks in solution A were placed inside a vacuum drying oven at room temperature where they were  
5 held 30 min at 0.04 MPa and then transferred to ambient pressure for 30 min. This procedure was  
6 repeated at least 3 times to complete the ion exchange. Then, solution B was slowly decanted into  
7 solution A and stirred at 200 rpm for 12 h at 25 °C. After 12 h, the wood blocks were carefully  
8 removed from the mixed solution, and repeatedly washed with methanol. Finally, TRW/Z-74 was  
9 obtained after drying with supercritical  $CO_2$ . Zn-MOF-74 powder was also obtained from this  
10 reaction. After removing TRW/Z-74, the mother liquor was centrifuged at 8000 rpm, and the  
11 collected products were washed with fresh methanol at least three times. Zn-MOF-74 was obtained  
12 by solvent removal under vacuum at 120 °C overnight.

#### 13 **2.4 Fabrication of TRW/Z-7N**

14 The previous ion exchange step was repeated by immersing the wet TRW samples (1 g dry mass) in  
15 50 ml DMF solution containing 5 mmol  $Zn(NO_3)_2 \cdot 6H_2O$ . After contacting  $Zn^{2+}$  with the carboxyl  
16 groups on the cellulose for 6 h at 25 °C, a well dispersed 50 ml methanol solution of the organic  
17 linkers (7 mmol 2-aminobenzimidazole and 3 mmol benzimidazole) was quickly poured into the  
18  $Zn^{2+}$  solution containing the TRW blocks and reacted for 8 h at 25 °C. Then the TRW blocks were  
19 removed, and unreacted organic linkers on the surfaces' were removed by fresh methanol. Finally,  
20 drying with supercritical  $CO_2$  produced the TRW/Z-7N. Pristine ZIF-7- $NH_2$  was also isolated from  
21 this reaction. The remaining MOF solution after removing TRW/Z-7N was centrifuged (8000 rpm,  
22 15 min), and the collected products were methanol washed several times and dried at 120 °C  
23 overnight.

#### 24 **2.5 Fabrication of TRW/Z-8N**

25  $Zn(NO_3)_2 \cdot 6H_2O$  (5 mmol) was dissolved in 50 mL of methanol. Then the as-prepared wet TRW  
26 samples (1 g dry mass) were added. The previous ion exchange steps were then repeated. Thereafter,  
27 50 ml of methanol solution containing 12.5 mmol of dissolved 2-methylimidazole and 10 mmol of 2-  
28 aminobenzimidazole were added into the  $Zn^{2+}$  solution while stirring (200 rpm) for 12 h. After  
29 reaction, unreacted organic linkers on the TRW surface were washed away with fresh methanol.

1 Finally, the TRW/Z-8N samples were obtained and dried with supercritical CO<sub>2</sub>. The corresponding  
2 pristine ZIF-8-NH<sub>2</sub> MOF was obtained by centrifugation (8000 rpm, 15 min) of the methanol  
3 solution from the TRW/ZIF-8-NH<sub>2</sub> preparation. The powder collected was cleaned with methanol  
4 several times and then dried at 120 °C overnight.

## 5 **2.6 Fabrication of TRW/M-MOF-74 (M=Mg<sup>2+</sup>, and Co<sup>2+</sup>)**

6 TRW/M-MOF-74 (M=Mg<sup>2+</sup>, and Co<sup>2+</sup>) was synthesized using the identical method described above  
7 except that Zn(NO<sub>3</sub>)•6H<sub>2</sub>O was replaced by an equimolar quantity of Mg(NO<sub>3</sub>)•6H<sub>2</sub>O or  
8 Co(NO<sub>3</sub>)•6H<sub>2</sub>O. Pristine Mg(NO<sub>3</sub>)•6H<sub>2</sub>O or Co(NO<sub>3</sub>)•6H<sub>2</sub>O was also isolated from this reaction. The  
9 remaining MOF solution after removing TRW/MOFs was centrifuged (8000 rpm, 15 min), and the  
10 collected products were methanol washed several times and dried at 120 °C overnight.

## 11 **3. Characterization Section**

### 12 **3.1 Material characterization**

13 The composites' microscopic morphologies were observed using a field emission scanning electron  
14 microscope (FE-SEM, Apreo) at an accelerating voltage of 5 kV. The samples' cross-sections were  
15 first trimmed with a sliding microtome (Leica sm2010 R, Germany) and longitudinal sections were  
16 cut with a sharp knife, then directly observed. Fourier transform infrared spectra (FT-IR) were  
17 recorded by a Nicolet 6700 with ATR mode over a scan range of 4000 to 500 cm<sup>-1</sup>. The samples'  
18 crystal structures were studied by X-ray Diffraction (XRD, SHIMADZU 6100) using copper K $\alpha$   
19 radiation ( $\lambda = 1.5406\text{\AA}$ ). TRW/MOFs were cut into slices of 1 cm both in length and width and 1 mm  
20 in thickness for XRD. The diffraction data were obtained in 5°/min angular steps at a counting time  
21 of 0.24s per step and recorded in the range of  $2\theta = 5\text{-}35^\circ$ . Thermal stability data for composites and  
22 pure MOFs were collected using a thermogravimetric analyzer (TG, 209F1) using 5-10 mg samples  
23 heated from 30°C to 800°C under Ar at a ramp rate of 10 K/min. The surface elemental composition  
24 and chemical state of the materials were studied using X-ray photoelectron spectroscopy (XPS,  
25 Thermo Scientific k-alpha). All binding energies were calibrated using C 1s with a binding energy of  
26 284.8 eV. The mechanical properties of TRW/MOF composites were evaluated by compression tests  
27 performed on a universal testing machine (Suns, UTM2503). A 10 KN load cell with a strain rate of  
28 10%/min, 23°C and 50% relative humidity were used. The dimensions of all specimens were 10 × 10

1  $\times 10$  mm (tangential x radial x axial). Young's modulus was evaluated by observing the slope of the  
2 initial linear region of the stress-strain curve. The yield point ( $\sigma_p$ ), indicates the stress at which  
3 structural collapse occurs. At the yield point, plastic deformation begins and the material is no longer  
4 able to recover elastically. The yield strength was defined as the stress at the intersection between the  
5 tangent of the elastic region and the tangent of the platform region. The Zn content in the composites  
6 was measured by inductively coupled plasma luminescence spectroscopy (ICP-OES, Optima 8300).  
7 A dry sample (0.1 g) was hydrolyzed with 72% (w/w)  $H_2SO_4$  prior to measurement. The composite  
8 specific surface areas were analyzed by  $N_2$  adsorption/desorption isotherms measured using ASAP  
9 2460 at 77 K. The pore capacity and pore distribution were analyzed by density inverse function  
10 theory (DFT). The samples ( $\sim 100$  mg) were degassed under vacuum at 100 °C for 12 h before  
11 measurement to remove water and residual solvents.

### 12 **3.2 Calculation of crystallinity**

13 The calculation of cellulose crystallinity in DW and TRW was done by the XRD peak intensity  
14 method<sup>2</sup> using equation (1):

$$15 \quad CI = \frac{I_{200} - I_{am}}{I_{200}} \times 100\% \quad (1)$$

16 where CI represents the crystallinity index,  $I_{200}$ , and  $I_{am}$  represent the intensity of diffraction peak  
17 intensities at (200) and amorphous regions, respectively.

### 18 **3.3 Loading content of MOFs on TRW.**

19 The weight ratio of MOFs on the TRW was calculated using equation 2:

$$20 \quad \text{Loading\%} = \frac{W_3 - W_2}{W_1 - W_2} \times 100\% \quad (2)$$

21 Where  $W_1$ ,  $W_2$ , and  $W_3$  represent the values of remaining weight percentages of pure MOFs, TRW,  
22 and TRW/MOF composites obtained from TG analysis, respectively.

### 23 **3.3 Gas adsorption testing**

24  $CO_2$  and  $N_2$  adsorption isotherms of the composites and MOF powders were analyzed volumetrically  
25 using a Micromeritics ASAP 2460 adsorption apparatus.  $CO_2$  adsorption isotherms were measured at  
26 two different temperatures (273 K, 298 K) up to 106 KPa (1.06 bar). The  $N_2$  adsorption isotherm was  
27 measured at 298 K rising to 106 KPa (1.06 bar). Approximately 120 mg of sample was desorbed

1 under vacuum at 150 °C for 12 h to remove moisture and other organic small molecules from the  
 2 sample. The CO<sub>2</sub> adsorption cycle test for TRW/Z-74 was also measured on the ASAP 2460  
 3 instrument. At the end of one cycle, the CO<sub>2</sub> was desorbed under vacuum at 60°C for 6 h. Afterwards,  
 4 the above CO<sub>2</sub> adsorption experiments were repeated.

### 5 3.4 Isothermal heat of adsorption( $\Delta H_{ads}$ ) calculation

6 The Clausius-Clapeyron equation (3) was used to calculate the  $\Delta H_{ads}$  of the composites at 273 K and  
 7 298 K as follows:<sup>3</sup>

$$8 \quad \ln\left(\frac{P_2}{P_1}\right) = -\frac{\Delta H_{ads}}{R} \left(\frac{1}{T_2} - \frac{1}{T_1}\right) \quad (3)$$

9 Where  $P_2, P_1$  denote pressure;  $T_2, T_1$  denote temperature; and  $R$  represents the gas constant.

### 10 3.5 Gas selectivity calculation

11 The CO<sub>2</sub>/N<sub>2</sub> (15%/85%) selectivities of TRW/MOFs were calculated by ideal solution adsorption  
 12 theory (IAST).<sup>4</sup> The molar fraction of each component in the adsorbed phase was calculated using  
 13 equation 4:

$$14 \quad \int_{t=0}^{p^{y_1/x_1}} F_1(t) d \ln t = \int_{t=0}^{p^{y_2/x_2}} F_2(t) d \ln t \quad (4)$$

15 Where  $t$  is a dummy variable,  $x_i$  is the molar fraction of component  $i$  in the adsorbed phase,  $y_i$  is the  
 16 molar fraction of component  $i$  in the gas phase,  $F_i$  is the adsorption isotherm function of the pure  
 17 component, and  $p$  is the total pressure.

18 The CO<sub>2</sub> and N<sub>2</sub> adsorption isotherms of TRW/MOFs were fitted by a Double-Site Langmuir  
 19 (DSL) model (equation 5):

$$20 \quad Q = \frac{q_1 b_1 p}{1 + b_1 p} + \frac{q_2 b_2 p}{1 + b_2 p} \quad (5)$$

21 Where  $Q$  is the total amount adsorbed (mmol/g),  $q_1, q_2$  represent the saturation capacity (mmol/g),  $b_1,$   
 22  $b_2$  represent the Langmuir parameter and  $p$  represents the pressure (KPa).

23 Equation (6) was used to determine the amount adsorbed in the gas mixture:

$$24 \quad \frac{1}{n_t} = \frac{x_1}{n_1} + \frac{x_2}{n_2} \quad (6)$$

25 Where  $n_t$  represents the total number of moles of adsorbent per unit mass in the adsorption phase,  $n_i$   
 26 ( $i=1, 2$ ) represents the number of moles of adsorbent per unit mass in component.  $i$  is the number of

1 moles of adsorbent per unit mass in the adsorption phase.

2 The selectivity calculation is then performed by equation 7:

3 
$$S = \frac{n_{CO_2} / n_{N_2}}{y_{CO_2} / y_{N_2}} \quad (7)$$

4

5

6

7

8

9

10

11

12

13

14

15

16



1 4. Figures

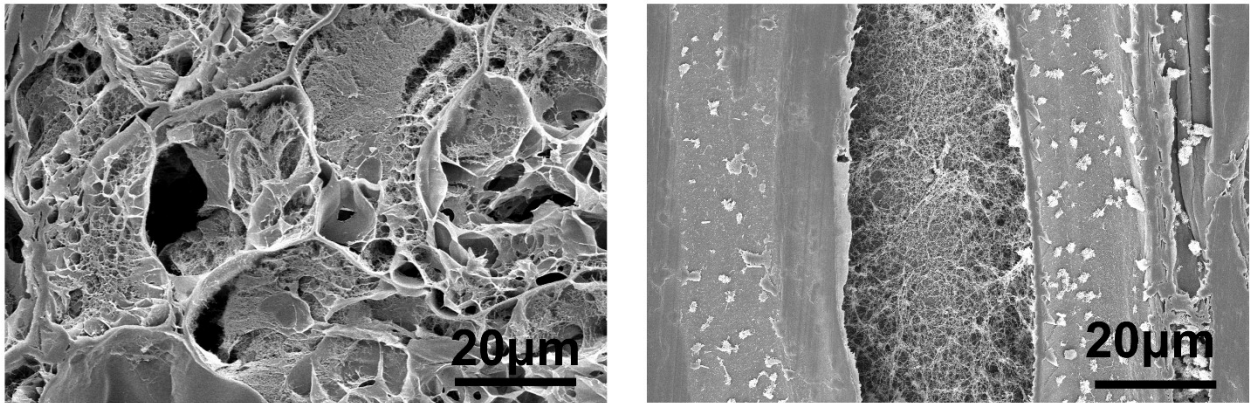

**Fig. S1 a**, FE-SEM image of regenerated wood cross-section and **b**, longitudinal section.

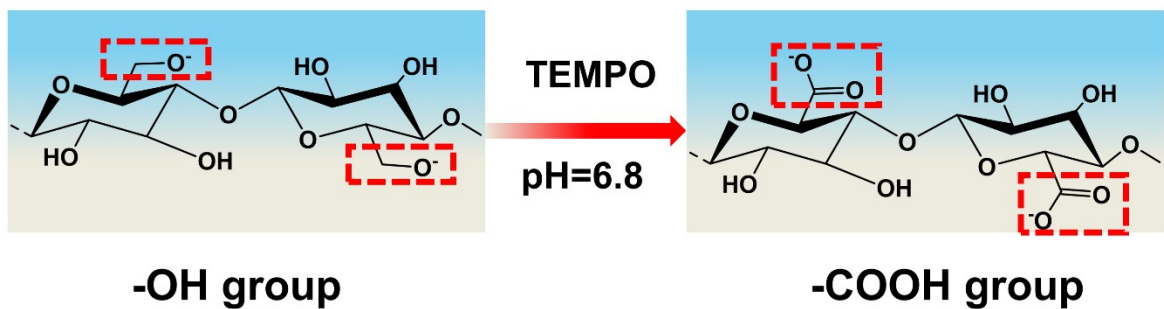

F

1  
 2 **ig. S2** Schematic illustration of transformation of hydroxyl groups to carboxy groups after TEMPO  
 3 oxidation treatment.

4

5

6

7

8

9

10

11

12

13

14

15

16

17

18

19

20

21

22

23

24

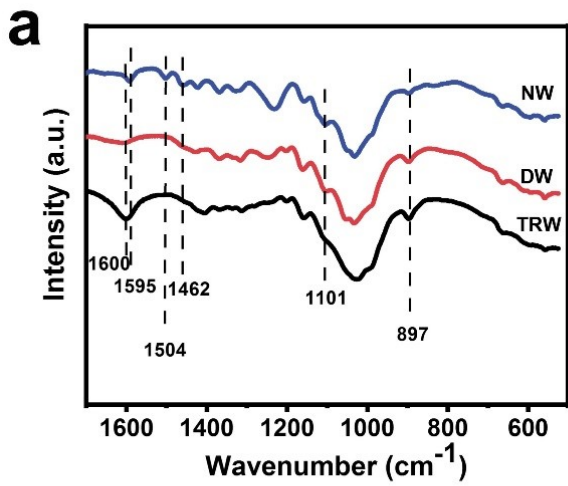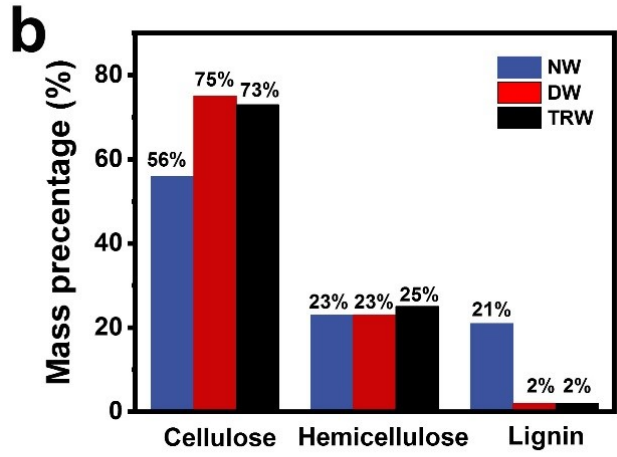

1  
 2 **Fig. S3 a**, FT-IR spectra and **b**, composition evolution of the natural wood (NW), delignified wood  
 3 (DW) and TEMPO-regenerated wood (TRW).

4  
 5  
 6  
 7  
 8  
 9  
 10  
 11  
 12  
 13  
 14  
 15  
 16  
 17  
 18  
 19  
 20

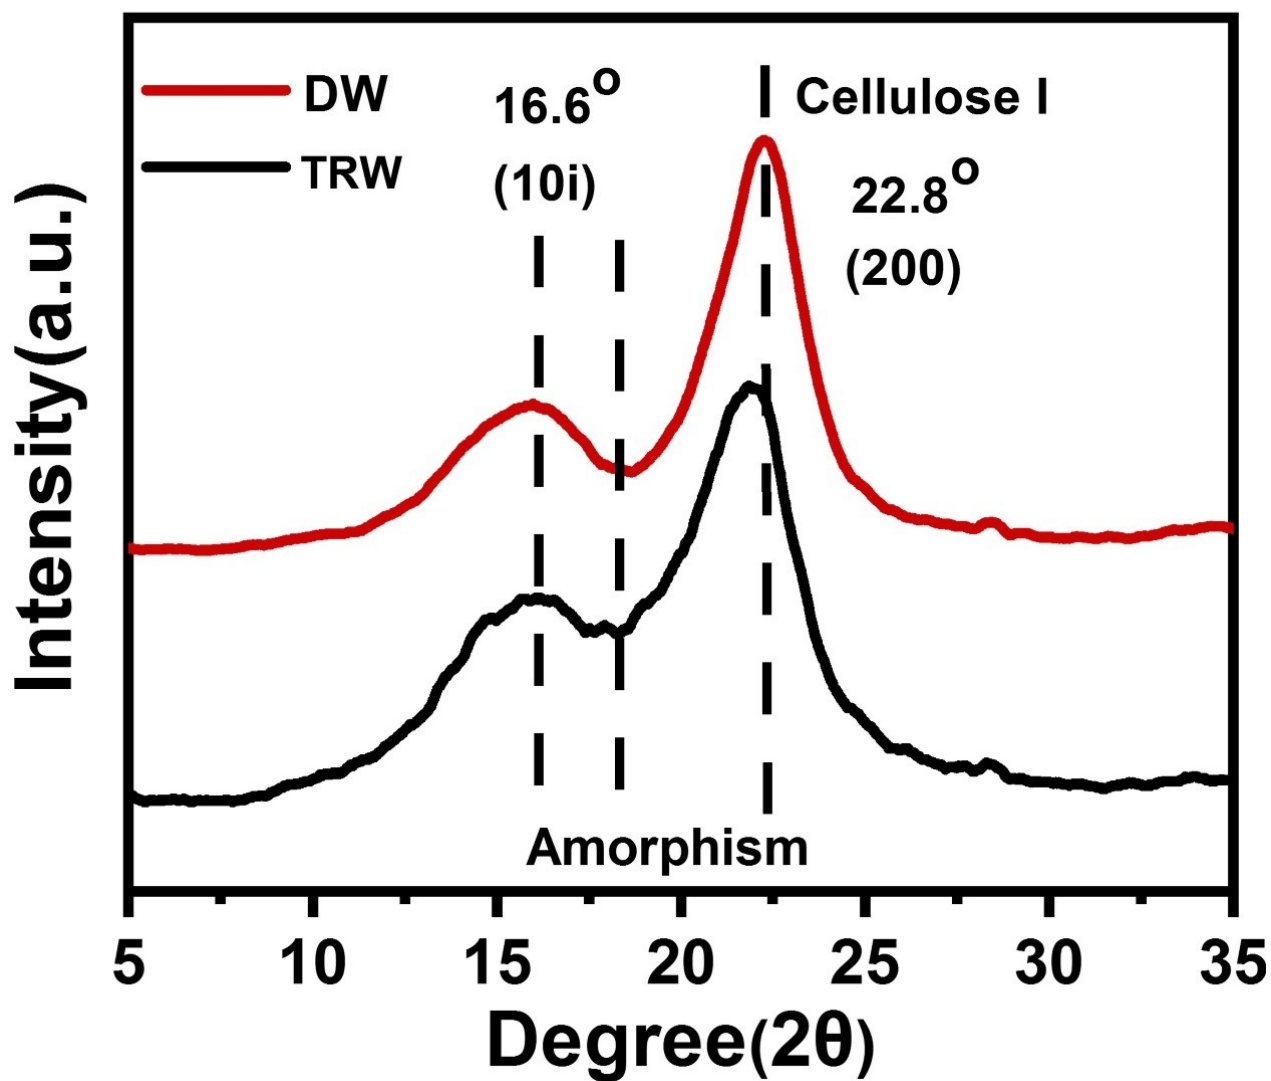

1  
 2 **Fig. S4** XRD patterns of delignified wood (DW) and TEMPO-regenerated wood (TRW).

3  
 4  
 5  
 6  
 7  
 8  
 9  
 10  
 11  
 12

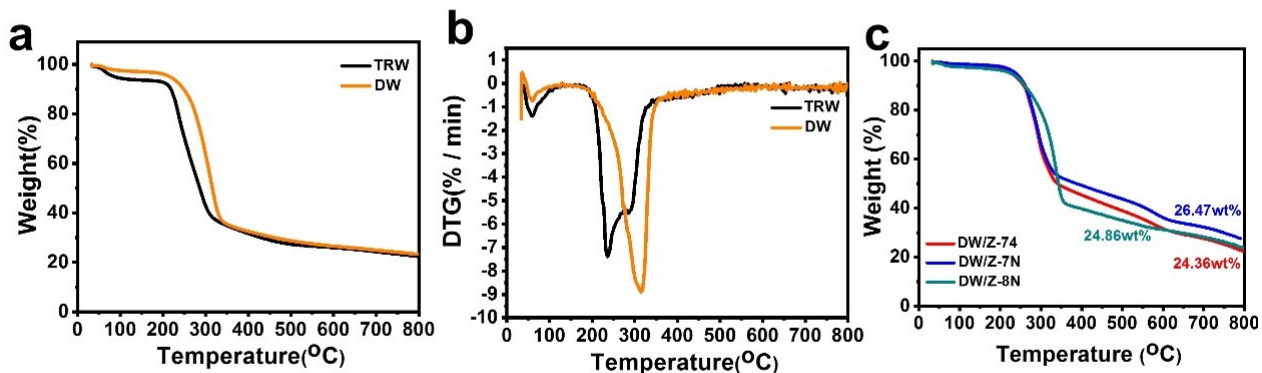

1  
2 **Fig. S5 a**, Thermogravimetric curves and **b**, corresponding first derivative weight loss curves of  
3 TEMPO-regenerated wood (TRW), and delignified wood (DW). **c**, Thermogravimetric curves of  
4 DW/Z-74, DW/Z-7N, DW/Z-8N.

5

6

7

8

9

10

11

12

13

14

15

16

17

18

19

20

21

22

23

24

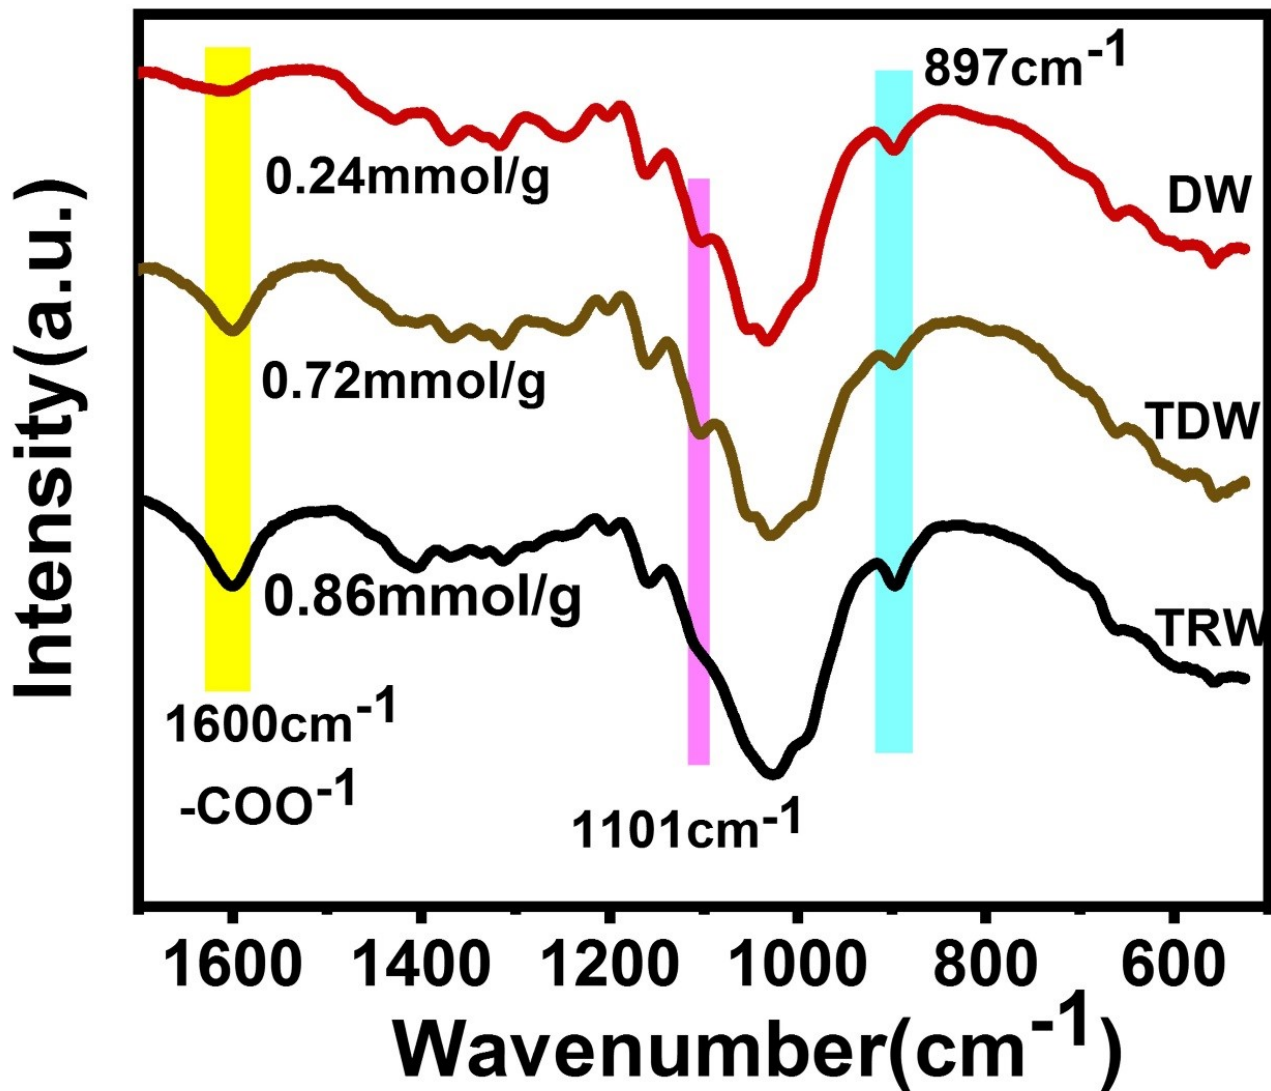

1  
 2 **Fig. S6** FT-IR spectra and carboxyl contents of delignified wood (DW), TEMPO-delignified wood  
 3 (TDW), and TEMPO-regenerated wood (TRW).

4

5

6

7

8

9

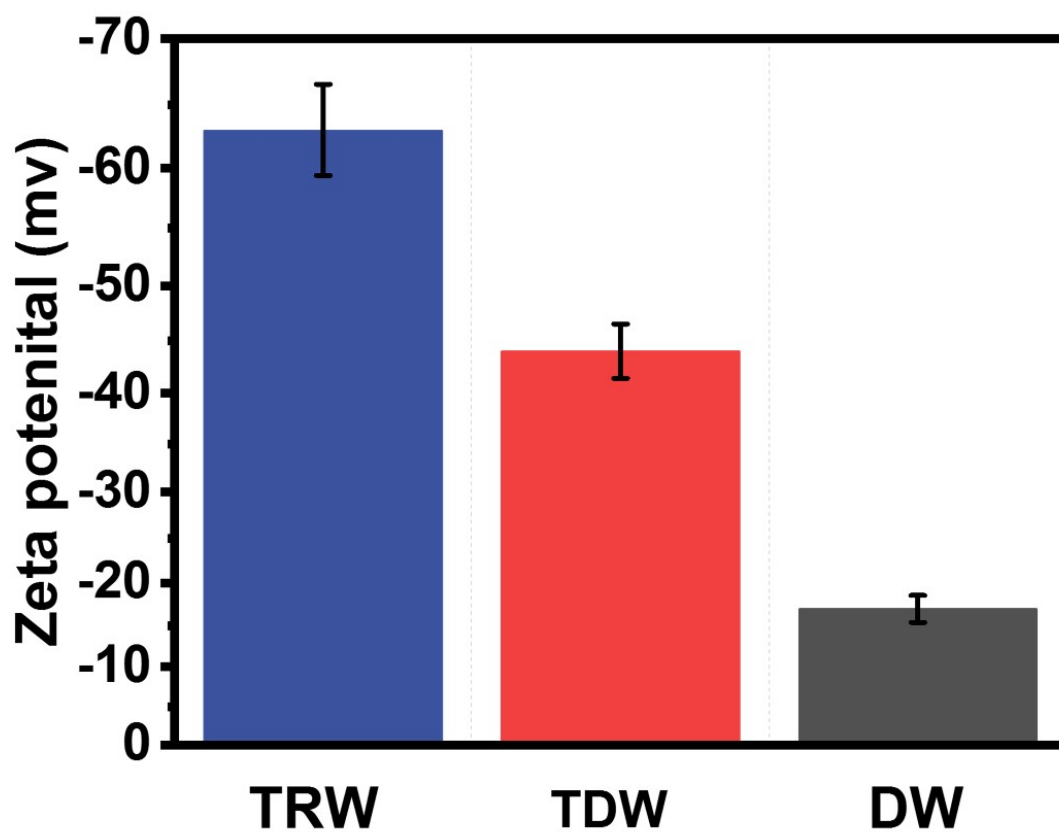

1

2 **Fig. S7** Apparent Zeta potential of TEMPO-regenerated wood (TRW), TEMPO-delignified wood  
3 (TDW), and delignified wood (DW).

4

5

6

7

8

9

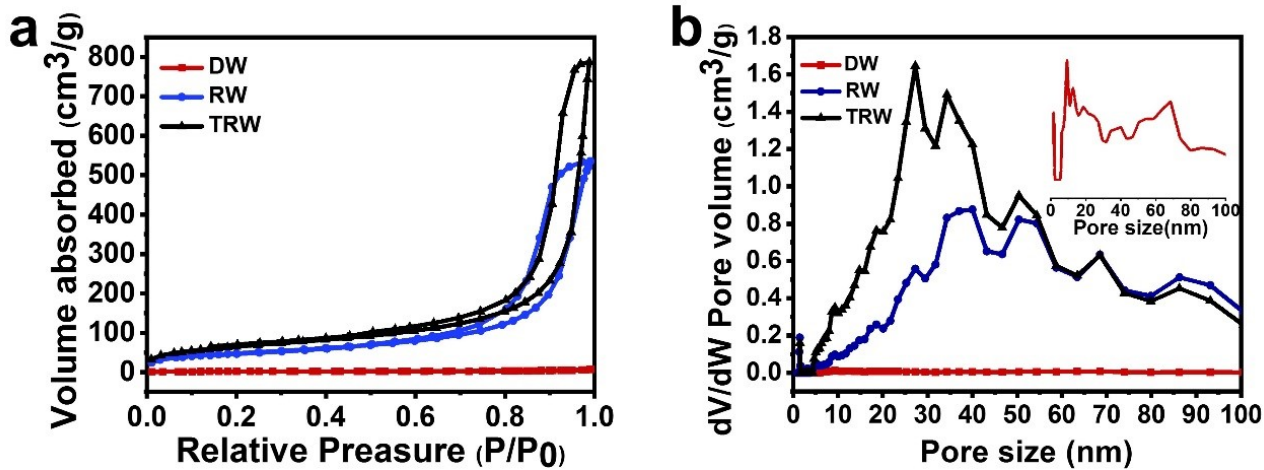

1

2 **Fig. S8 a**, N<sub>2</sub> adsorption/desorption isotherms of delignified wood (DW), regenerated wood (RW)

3 and TEMPO-regenerated wood (TRW) and **b**, pore size distribution (PSD) curves of DW, RW and

4 TRW.

5

6

7

8

9

10

11

12



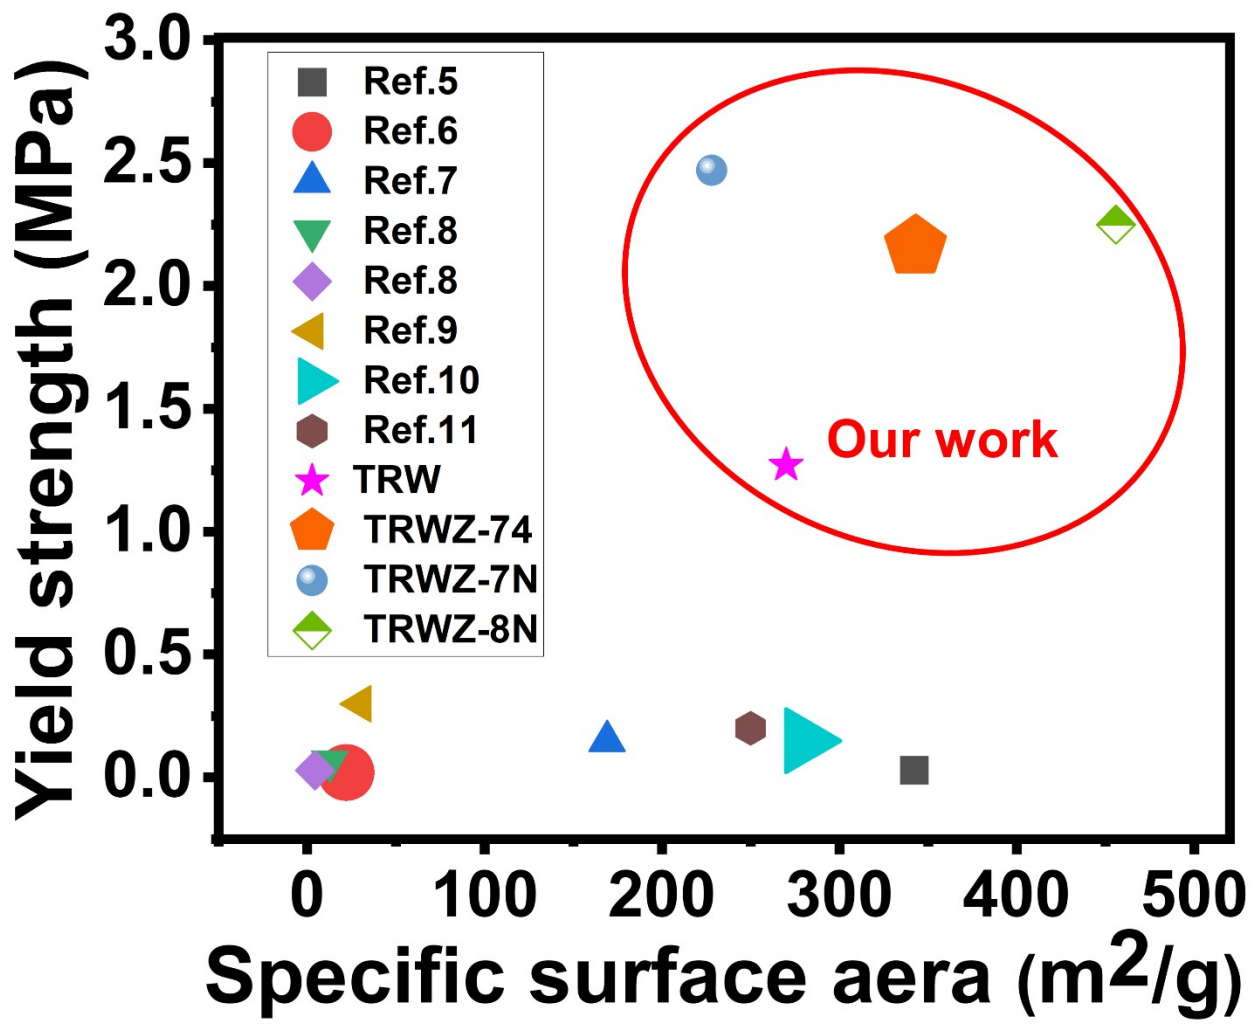

1

2 **Fig. S9** Yield strength versus the specific surface area for documented cellulose-based aerogels and  
 3 foams.<sup>5-11</sup>

4

5

6

7

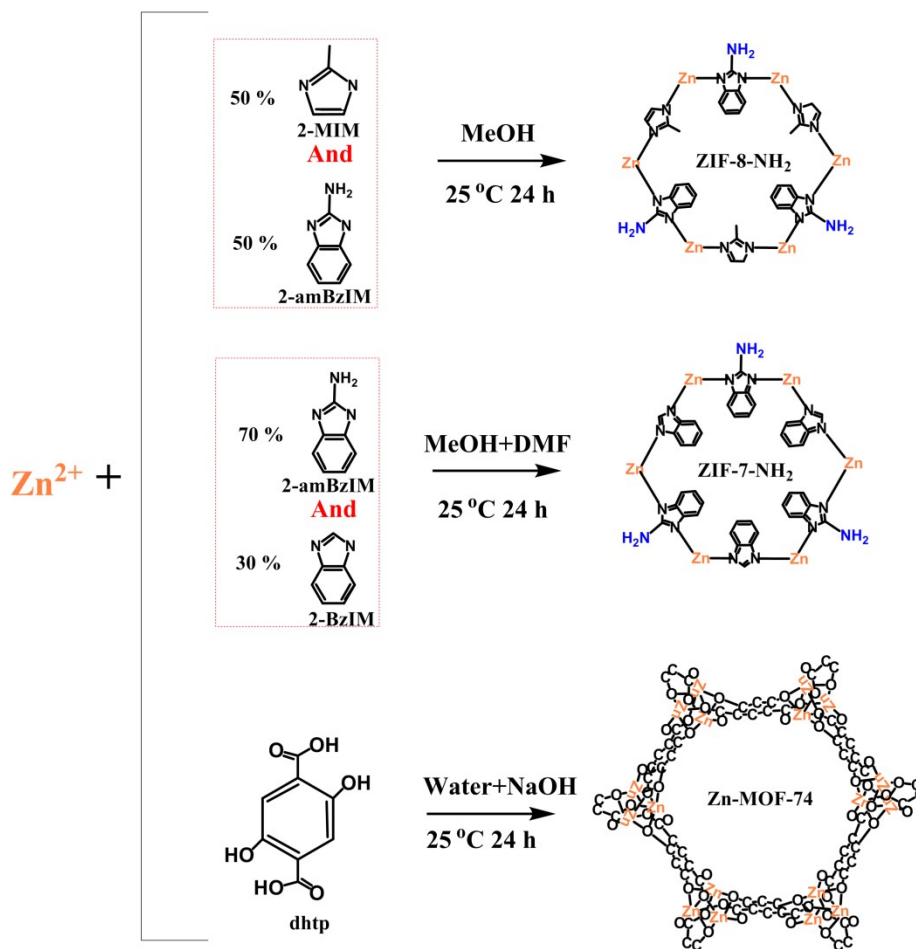

1

2 **Fig. S10** Synthesis scheme of pure MOFs.

3

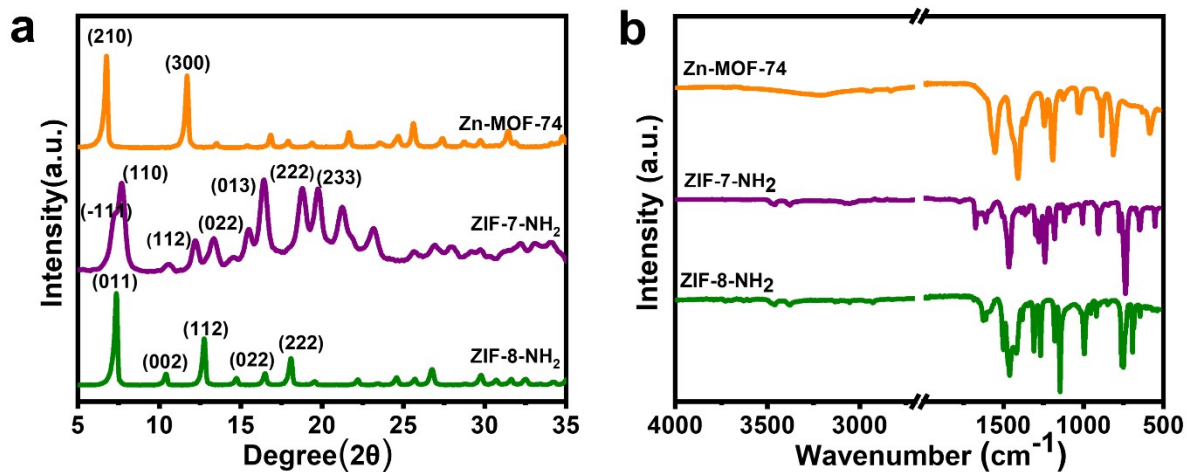

1

2 **Fig. S11 a**, XRD patterns and **b**, FTIR spectra of Zn-MOF-74, ZIF-7-NH<sub>2</sub>, and ZIF-8-NH<sub>2</sub>.

3

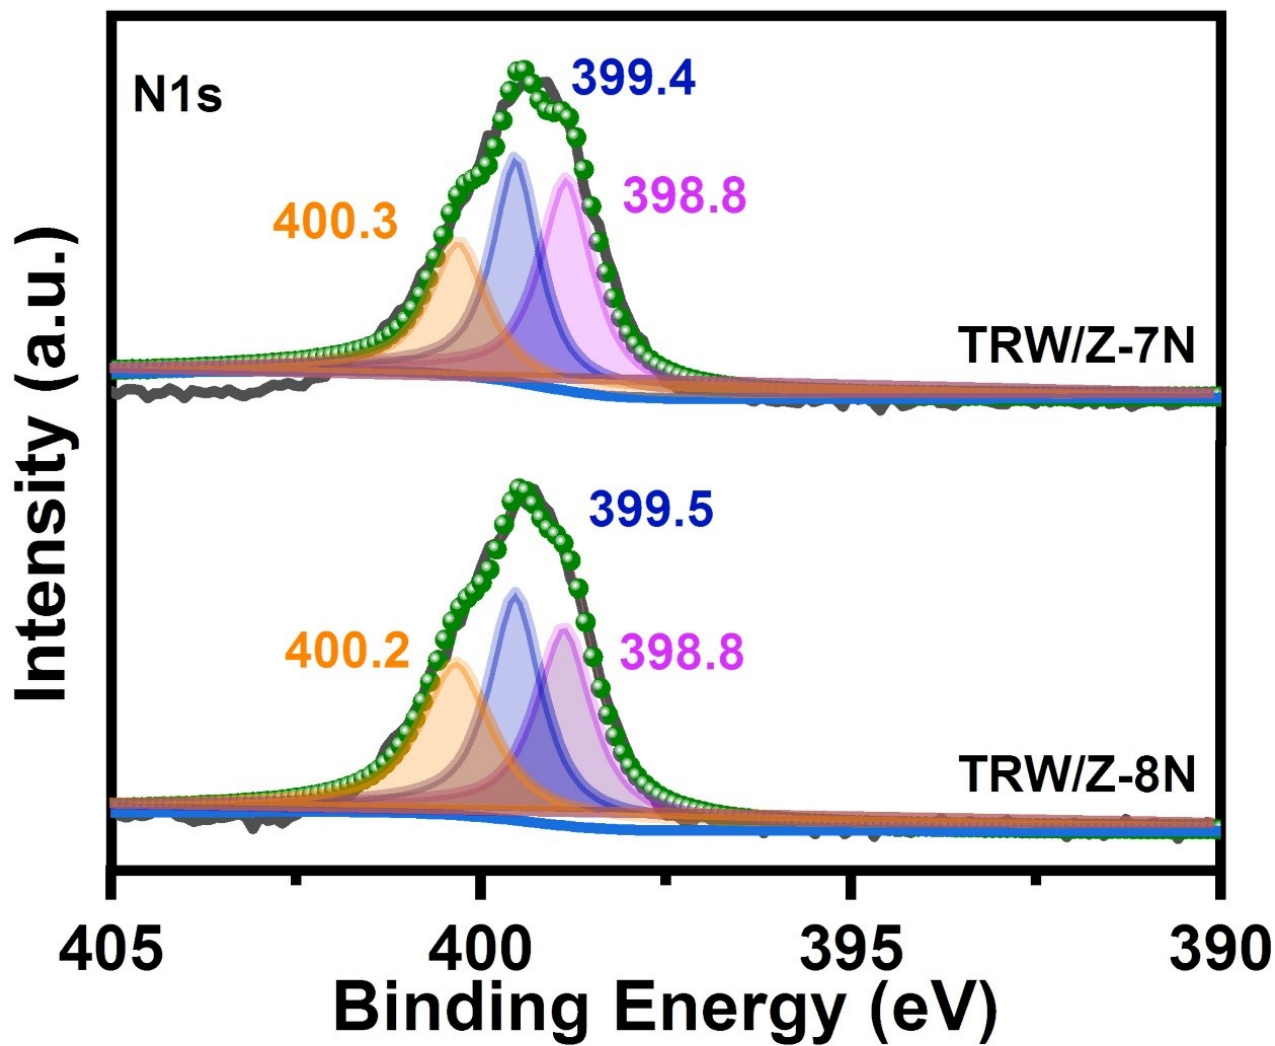

1

2 **Fig. S12** High-resolution N1s XPS spectra of TRW/Z-7N and TRW/Z-8N.

3

4

5

6

7

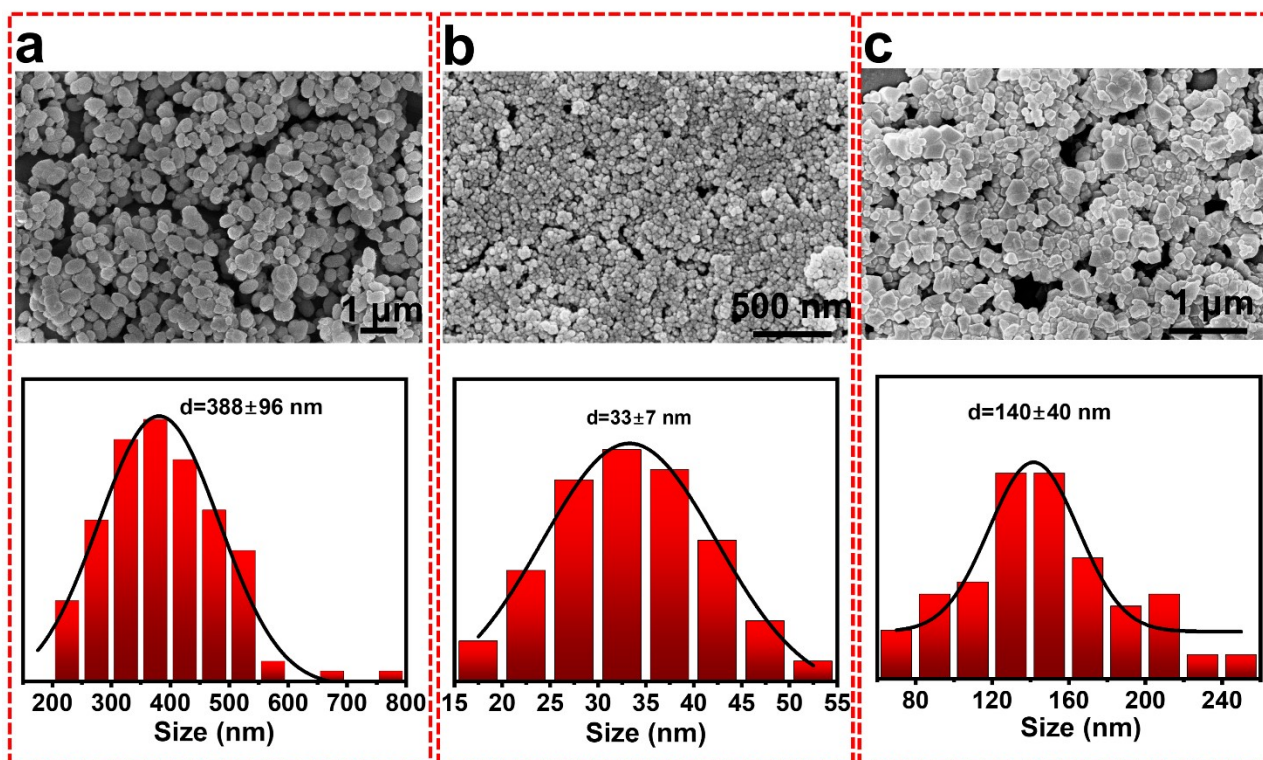

1

2 **Fig. S13** SEM images and particle size distribution of **a.** Zn-MOF-74, **b.** ZIF-7-NH<sub>2</sub>, **c.** ZIF-8-NH<sub>2</sub>.

3

4

5

6

7

8

9

10

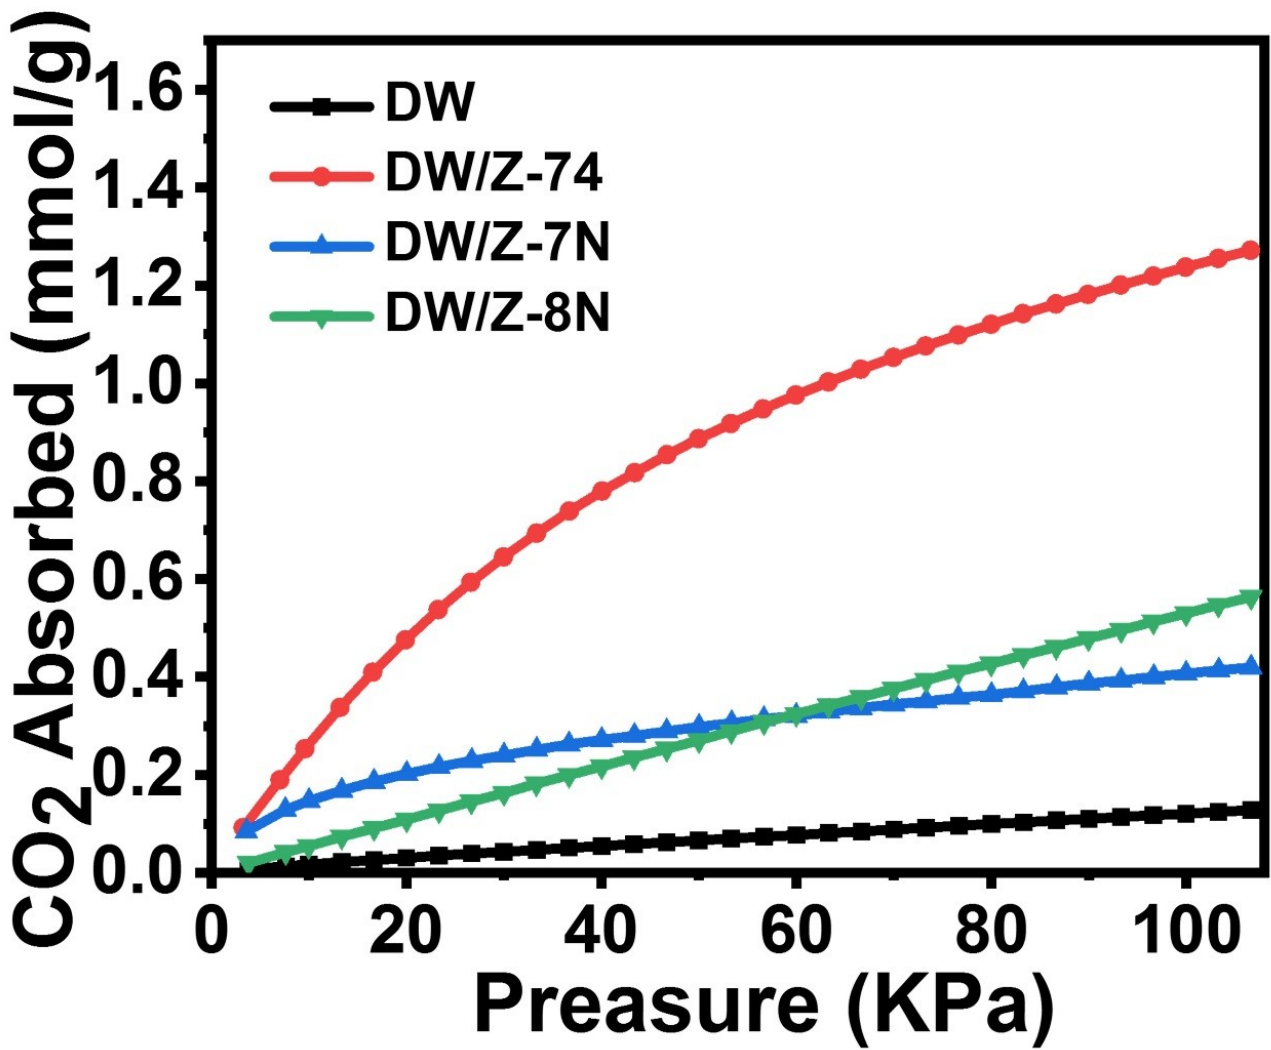

1  
2 Fig. S14 CO<sub>2</sub> sorption isotherms of DW, DW/Z-74, DW/Z-7N, DW/Z-8N at 298 k, 106 KPa.

3  
4  
5

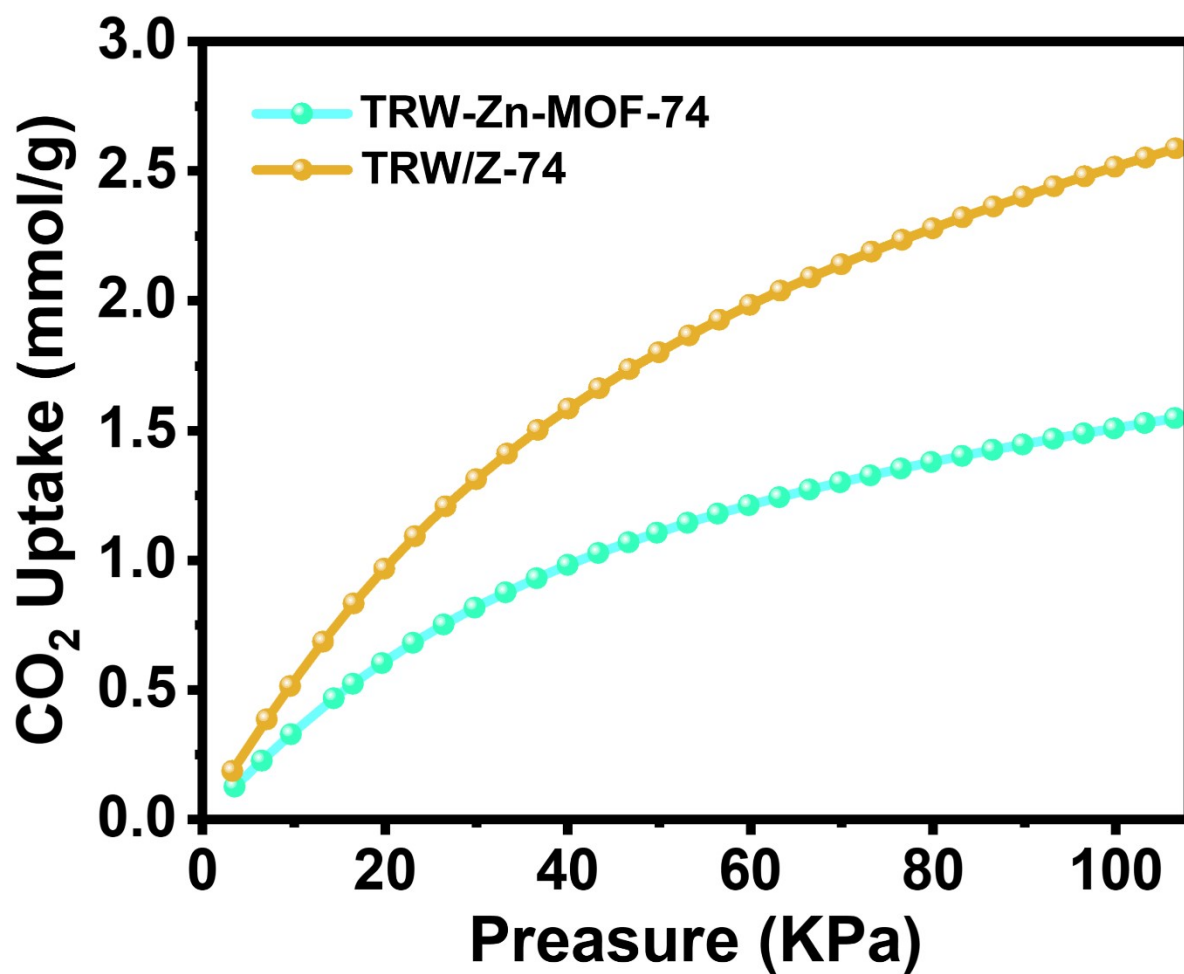

1

2 **Fig. S15** CO<sub>2</sub> sorption isotherms of TRW-Zn-MOF-74 and TRW/Z-74 at 298 k, 106 KPa.

3

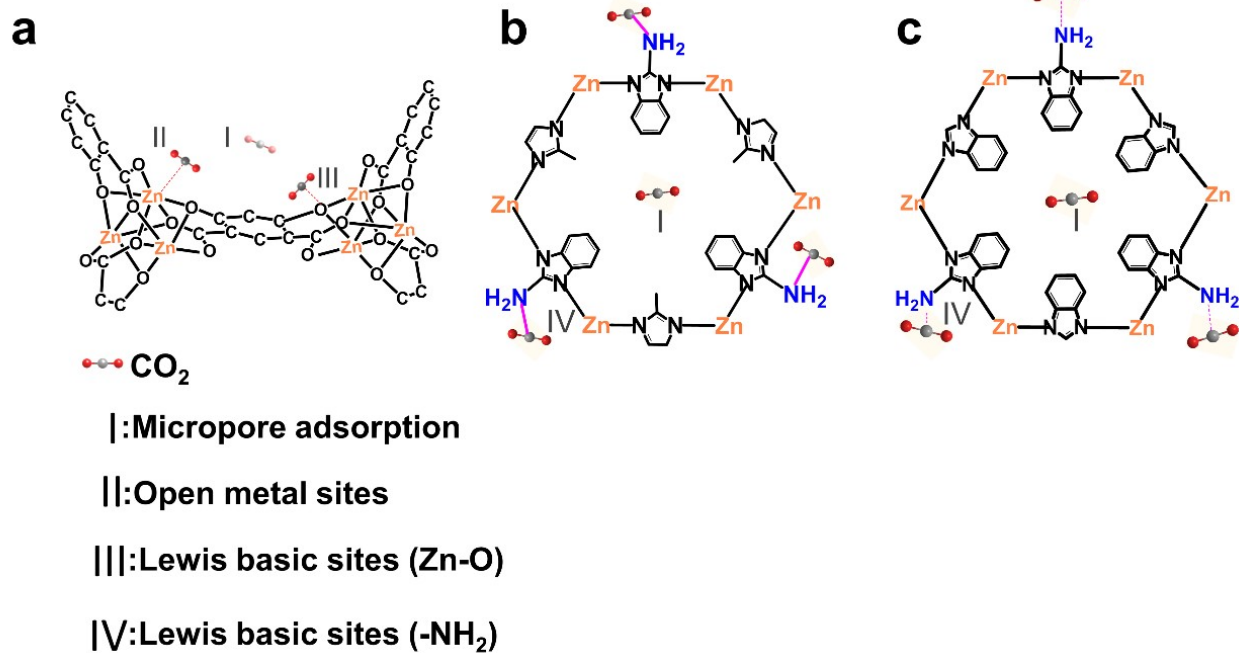

1

2 **Fig. S16** Mechanism of CO<sub>2</sub> adsorption by a, Zn-MOF-74; b, ZIF-8-NH<sub>2</sub>; c, ZIF-7-NH<sub>2</sub>.

3

4

5

6

7

8

9



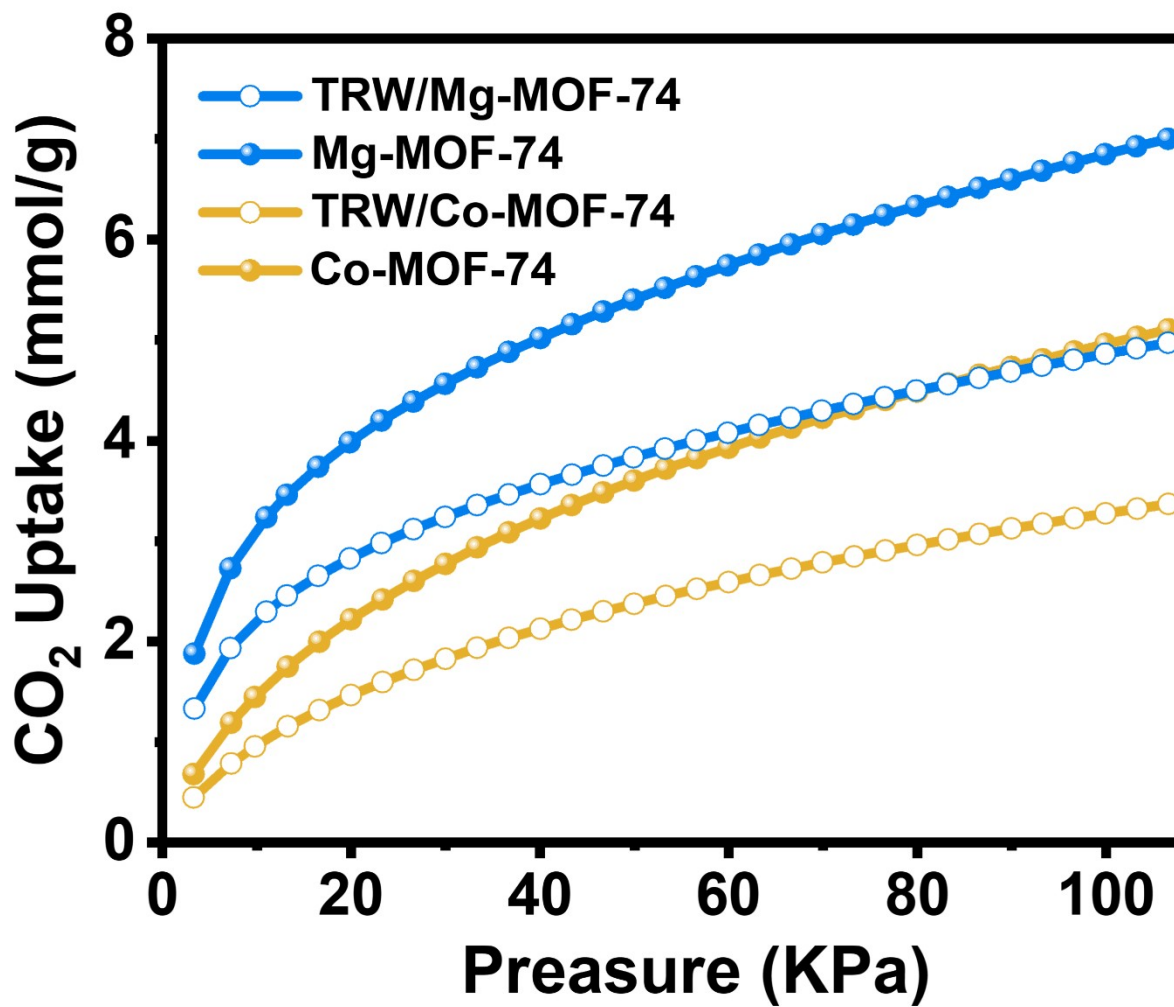

1

2 **Fig. S17** CO<sub>2</sub> sorption isotherms of TRW/Mg-MOF-74, Mg-MOF-74, TRW/Co-MOF-74, and Co-  
3 MOF-74 at 298 k, 106 KPa.

4

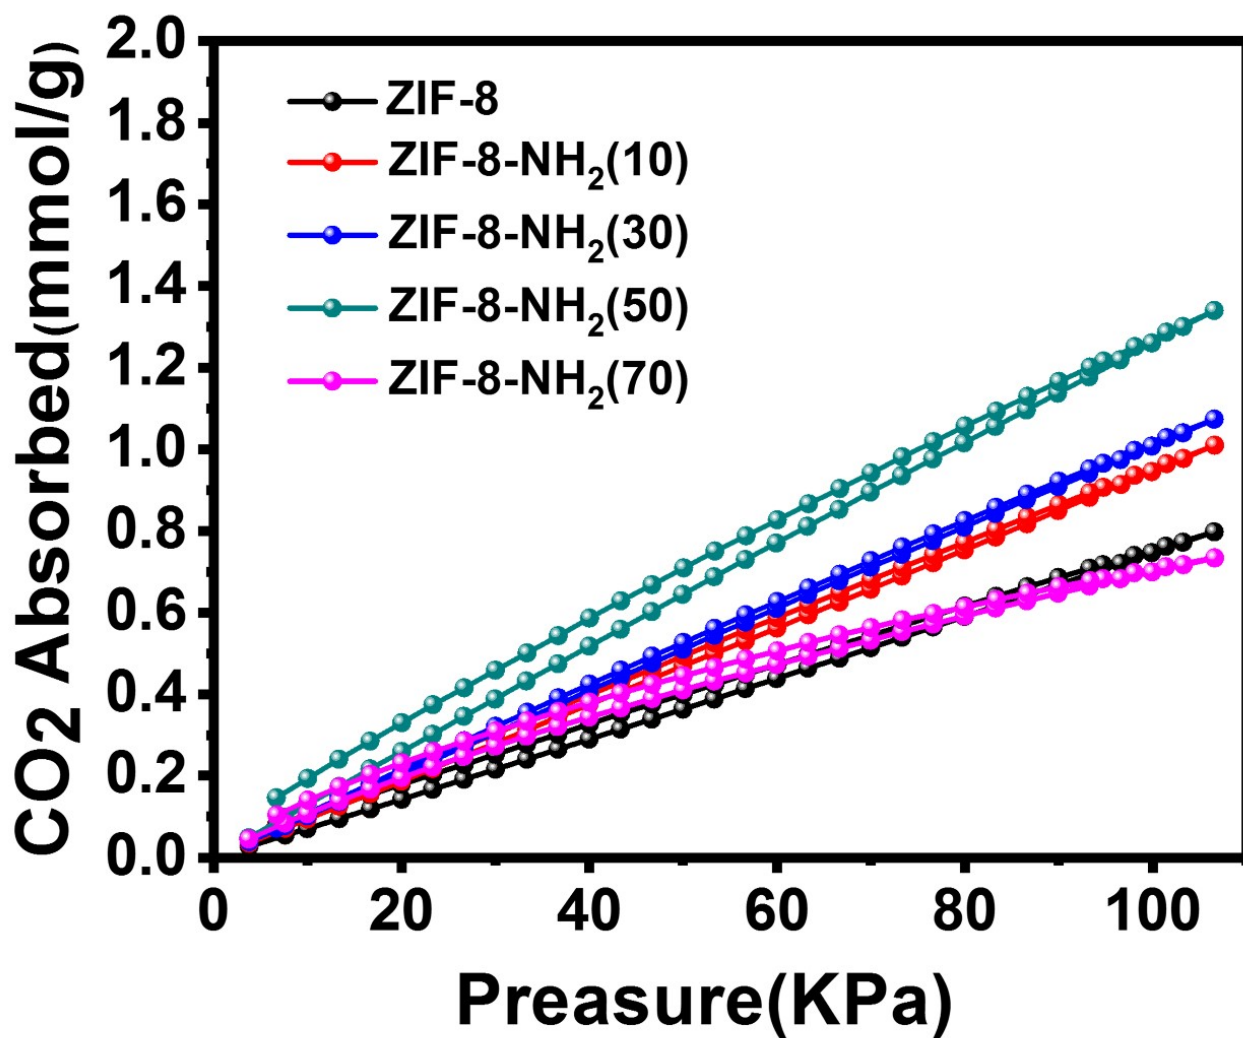

1

2 Fig. S18 CO<sub>2</sub> sorption isotherms of ZIF-8 and ZIF-8-NH<sub>2</sub>(X), X=10, 30, 50, 70 at 298 k, 106 KPa.

3

4

5

6

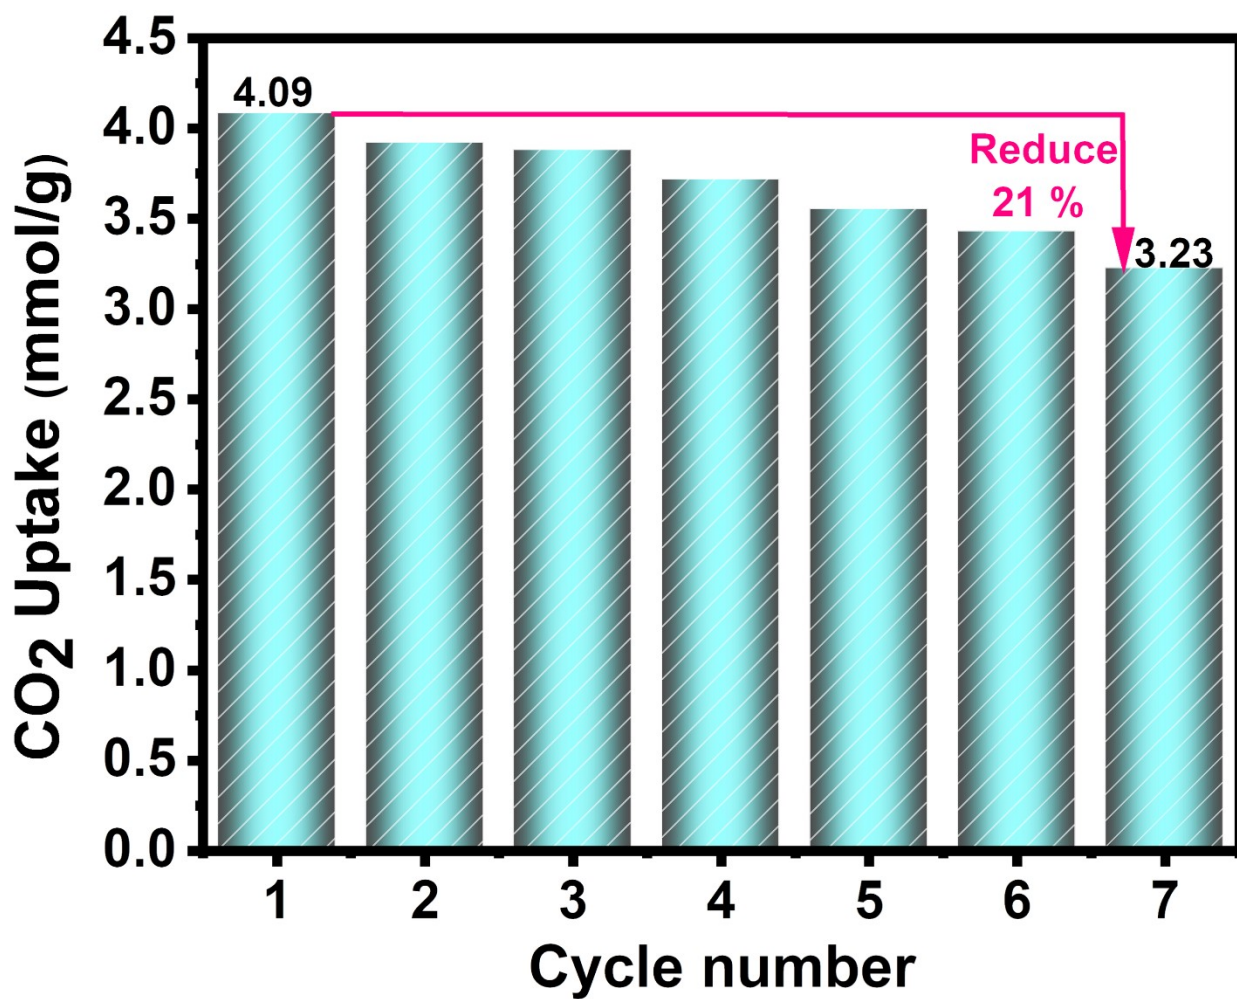

1

2 Fig. S19 CO<sub>2</sub> adsorption cycles over Zn-MOF-74 at 298 K, 106KPa.

3

4

5

6

7

1 **5. Tables**

2 **Table S1** Specific surface areas, pore volumes, micropore volumes, CO<sub>2</sub> adsorption at 273K and  
 3 298K and isothermal heats of adsorption of TRW, RW, DW and TRW/MOF composites and their  
 4 corresponding MOF powders

| Samples               | S <sub>BET</sub> (m <sup>2</sup> /g) | Pore volume (cm <sup>3</sup> /g) | Micropore volume(cm <sup>3</sup> /g) | CO <sub>2</sub> uptake (mmol/g) 273 K | CO <sub>2</sub> uptake (mmol/g) 298 K | ΔH <sub>ads</sub> (KJ/mol) |
|-----------------------|--------------------------------------|----------------------------------|--------------------------------------|---------------------------------------|---------------------------------------|----------------------------|
| TRW                   | 270                                  | 1.02                             | 0.0042                               | 0.26                                  | 0.24                                  | 2.34                       |
| RW                    | 184                                  | 0.61                             | 0.0016                               | /                                     | /                                     | /                          |
| DW                    | 5.6                                  | 0.01                             | 0.0007                               | 0.16                                  | 0.14                                  | 1.45                       |
| TRW/Z-74              | 343                                  | 0.43                             | 0.12                                 | 3.42                                  | 2.59                                  | 28.13                      |
| TRW/Z-7N              | 228                                  | 0.80                             | 0.033                                | 0.92                                  | 0.86                                  | 19.57                      |
| TRW/Z-8N              | 456                                  | 0.70                             | 0.15                                 | 1.44                                  | 1.34                                  | 11.89                      |
| Zn-MOF-74             | 702                                  | 0.38                             | 0.26                                 | 5.64                                  | 4.09                                  | 30.87                      |
| ZIF-7-NH <sub>2</sub> | 406                                  | 0.79                             | 0.09                                 | 1.47                                  | 1.31                                  | 24.83                      |
| ZIF-8-NH <sub>2</sub> | 833                                  | 0.56                             | 0.37                                 | 2.47                                  | 2.27                                  | 14.75                      |

5

6 **Table S2** MOF contents of TRW/MOFs

|          | MOFs content (wt.%) |
|----------|---------------------|
| TRW/Z-74 | 35.53               |
| TRW/Z-7N | 41.15               |
| TRW/Z-8N | 37.44               |

7

8 **Table S3** Density, Young's modulus and yield strength of TRW and TRW/MOF composites parallel

1 to the longitudinal axis<sup>a</sup>

---

| Sample   | Density(kg/m <sup>3</sup> ) | Young's modulus (MPa) | Yield strength (MPa) |
|----------|-----------------------------|-----------------------|----------------------|
| TRW      | 81.37±4                     | 26.43±5               | 1.27±0.10            |
| TRW/Z-74 | 112.59±5                    | 46.29±9               | 2.16±0.13            |
| TRW/Z-7N | 121.43±7                    | 57.37±11              | 2.47±0.40            |
| TRW/Z-8N | 116.23±4                    | 49.16±7               | 2.25±0.15            |

---

2 The values in parentheses are the sample standard deviations.

3 **Table S4** Dual-site Langmuir (DSL) model (equation S5) parameters of TRW/MOF composites.

---

| Parameters     | TRW/Z-74        |                | TRW/Z-7N        |                | TRW/Z-8N        |                |
|----------------|-----------------|----------------|-----------------|----------------|-----------------|----------------|
|                | CO <sub>2</sub> | N <sub>2</sub> | CO <sub>2</sub> | N <sub>2</sub> | CO <sub>2</sub> | N <sub>2</sub> |
| q <sub>1</sub> | -0.0214         | -8.2293        | 0.1215          | -0.0034        | -0.0024         | -0.0012        |
| q <sub>2</sub> | 4.1413          | 1.7541         | 0.8992          | 0.2700         | 25.1540         | 0.4174         |
| b <sub>1</sub> | 2.7389          | 1.2875         | 1.0275          | -8.2188        | 4.6516          | 3.1620         |
| b <sub>2</sub> | 0.0157          | 8.3958         | 0.0125          | 0.0043         | 5.0392          | 0.0022         |
| R <sup>2</sup> | 0.9999          | 0.99947        | 0.9949          | 0.9979         | 0.9999          | 0.9989         |

---

4

5

6

7

8

9

10

11

12

## 1 6. Reference

- 2 1. H. Guan, Z. Cheng and X. Wang, *ACS nano*, 2018, **12**, 10365-10373.
- 3 2. U. P. Agarwal, S. A. Ralph, C. Baez, R. S. Reiner and S. P. Verrill, *Cellulose*, 2017, **24**,
- 4 1971-1984.
- 5 3. A. Kumar, D. G. Madden, M. Lusi, K. J. Chen, E. A. Daniels, T. Curtin, J. J. Perry IV and M.
- 6 J. Zaworotko, *Angew. Chem., Int. Ed.*, 2015, **54**, 14372-14377.
- 7 4. S. Ga, S. Lee, G. Park, J. Kim, M. Realff and J. H. Lee, *Chem. Eng. J.*, 2021, **420**, 127580.
- 8 5. H. Sehaqui, M. Salajková, Q. Zhou and L. A. Berglund, *Soft Matter*, 2010, **6**, 1824-1832.
- 9 6. S. Xiao, R. Gao, Y. Lu, J. Li and Q. Sun, *Carbohydr. Polym.*, 2015, **119**, 202-209.
- 10 7. N. Pircher, L. Carbajal, C. Schimper, M. Bacher, H. Rennhofer, J.-M. Nedelec, H. C.
- 11 Lichtenegger, T. Rosenau and F. Liebner, *Cellulose*, 2016, **23**, 1949-1966.
- 12 8. F. Jiang, S. Hu and Y.-l. Hsieh, *ACS Appl. Nano Mater.*, 2018, **1**, 6701-6710.
- 13 9. J. Wei, S. Geng, J. Hedlund and K. Oksman, *Cellulose*, 2020, **27**, 2695-2707.
- 14 10. H. Sai, R. Fu, L. Xing, J. Xiang, Z. Li, F. Li and T. Zhang, *ACS Appl. Mater. Interfaces*, 2015,
- 15 **7**, 7373-7381.
- 16 11. Y. Li, L. Zhu, N. Grishkewich, K. C. Tam, J. Yuan, Z. Mao and X. Sui, *ACS Appl. Mater.*
- 17 *Interfaces*, 2019, **11**, 9367-9373.

18
